# Supplementary figures and images for: Novel approach to artefact detection and the definition of normal ranges of segmental strain and strain-rate values
Source: HighWire-hosted journal article supplement (doi:10.1136/openhrt-2022-002136), 2022-12-01

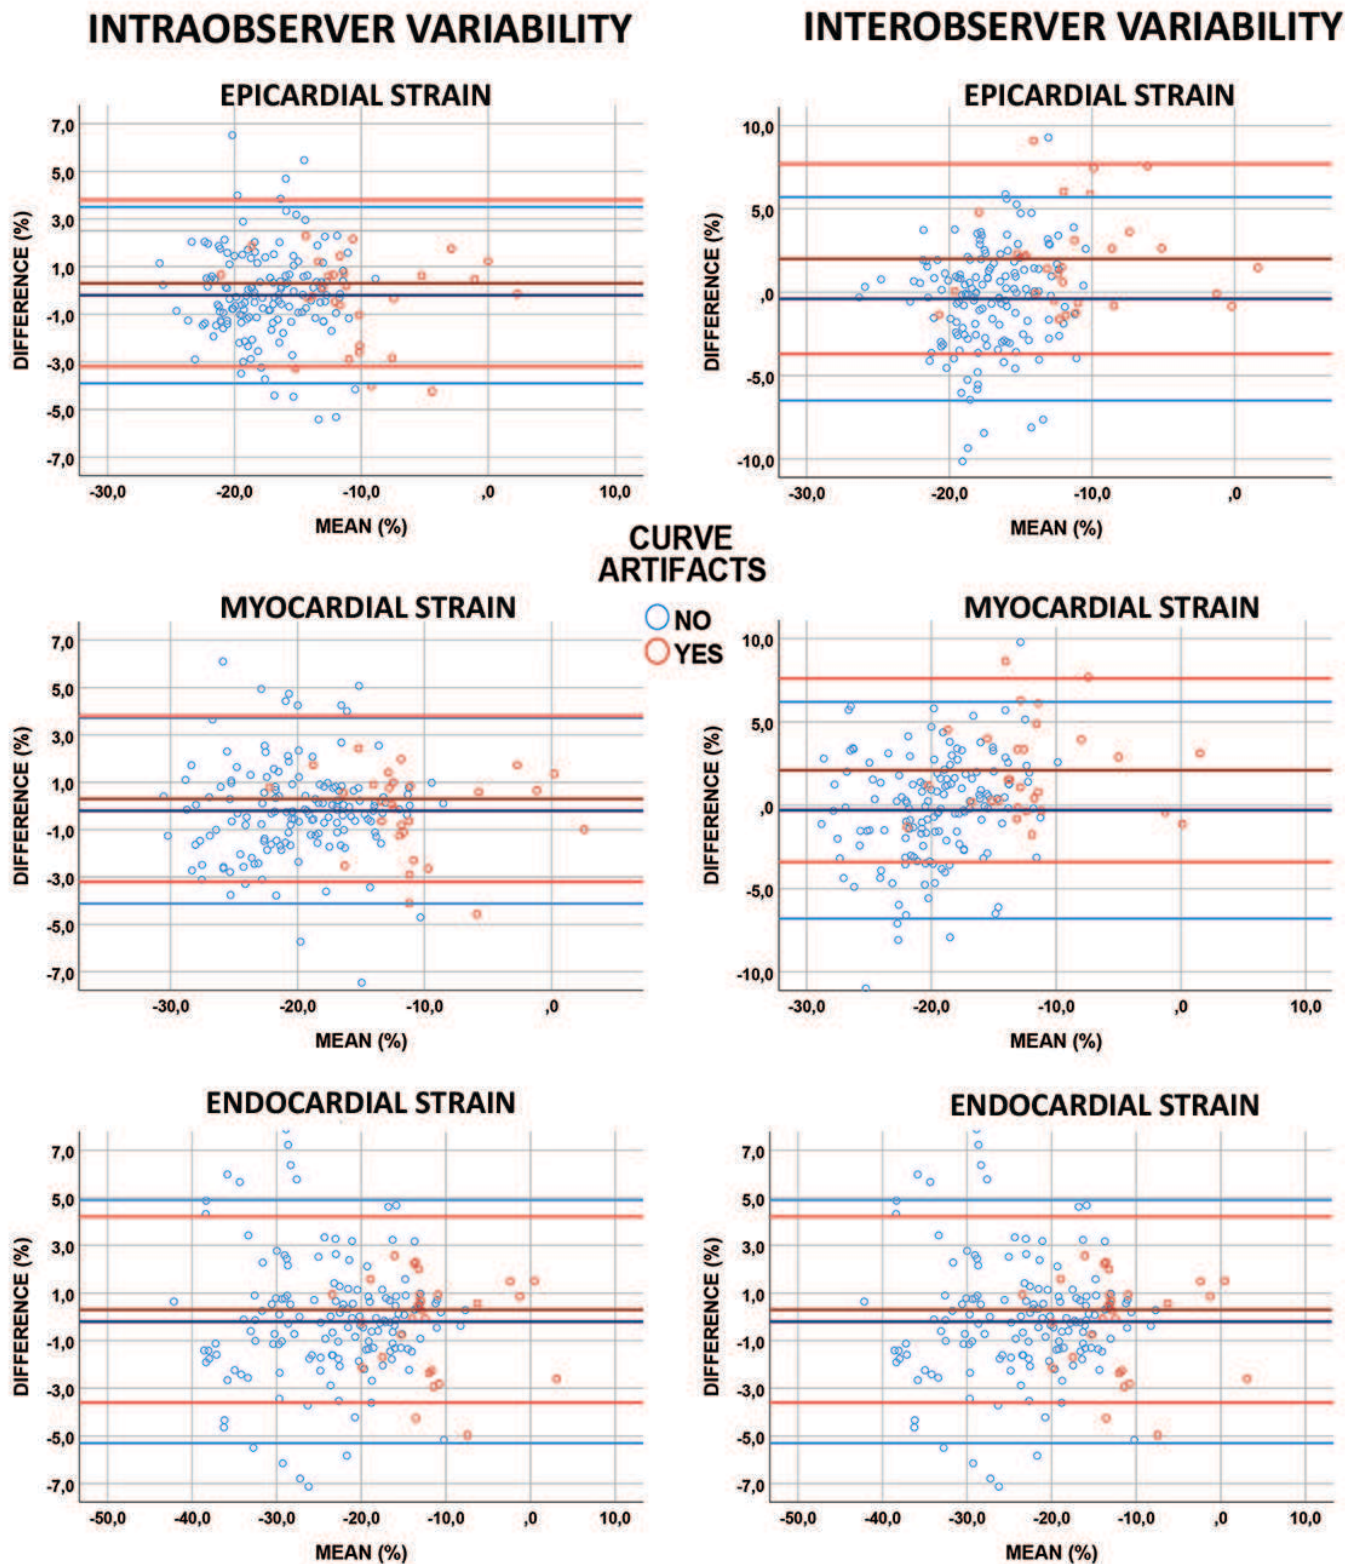

Supplement: openhrt-2022-002136supp001_data_supplement.pdf [file openhrt-2022-002136supp001_data_supplement.pdf]

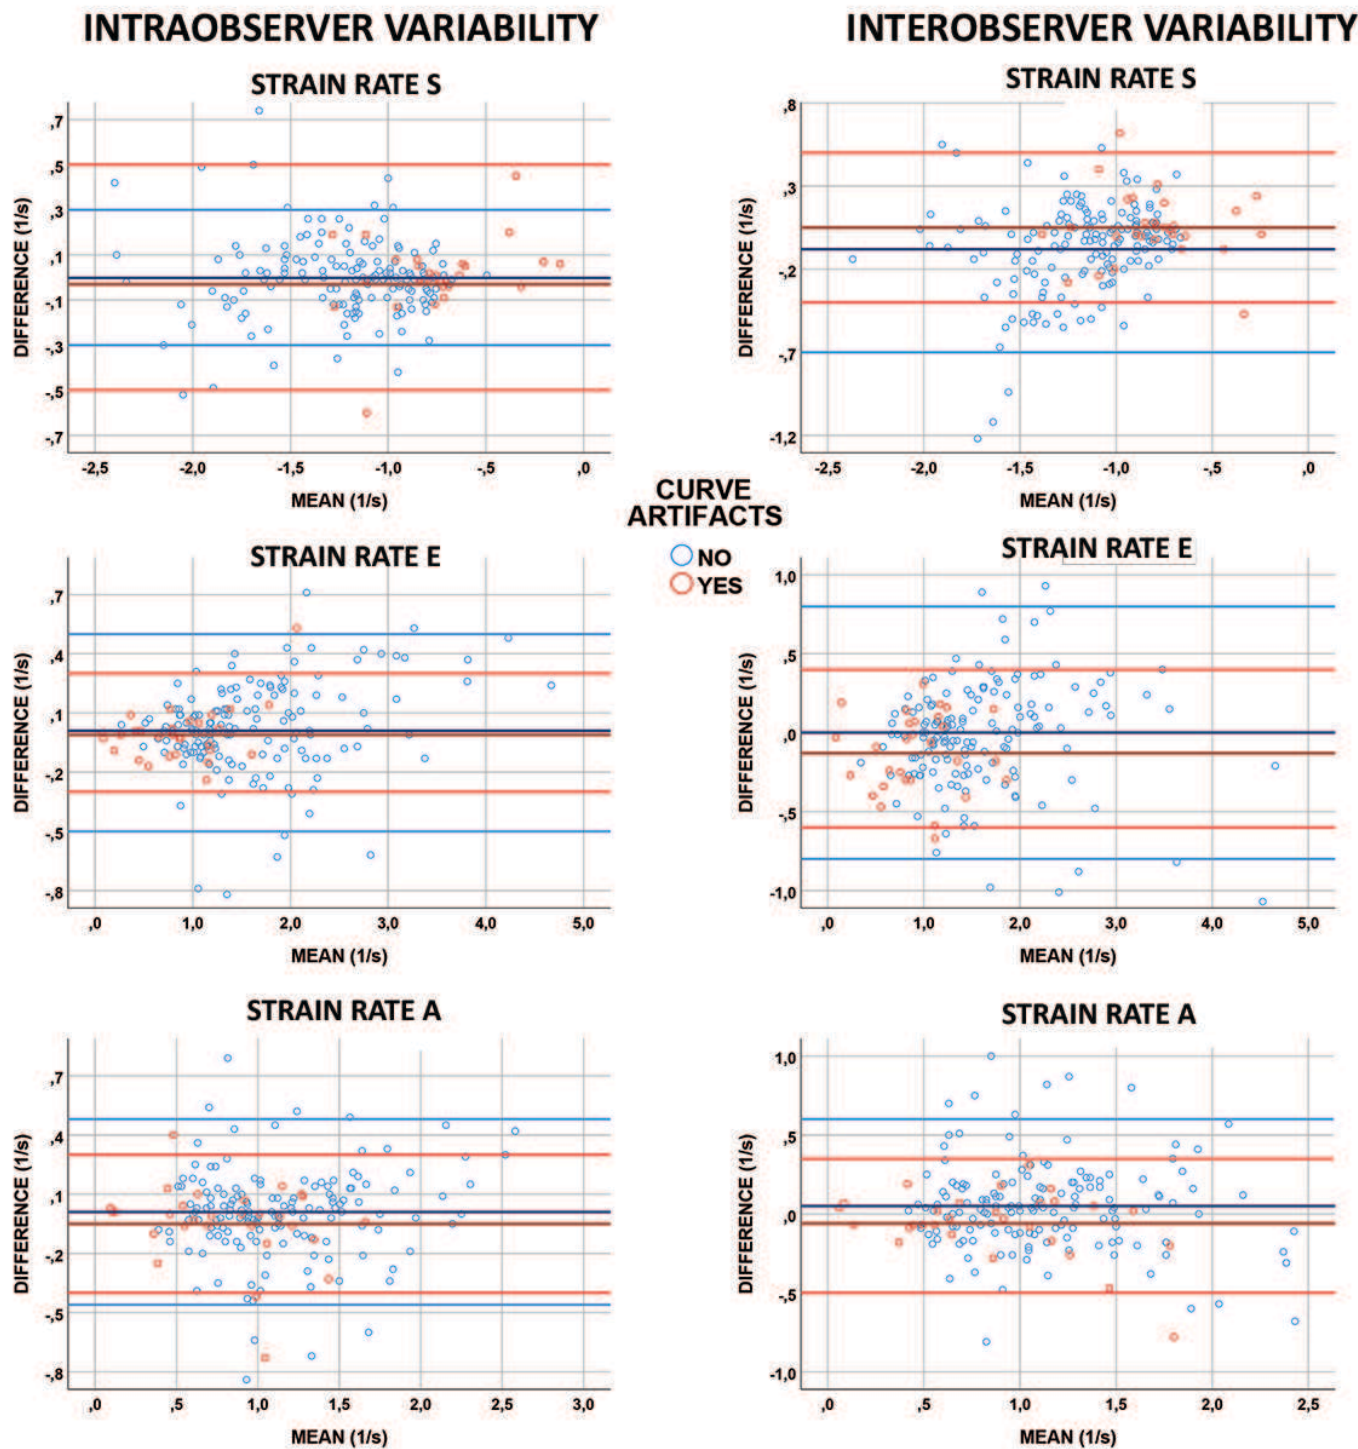

Supplement: openhrt-2022-002136supp002_data_supplement.pdf [file openhrt-2022-002136supp002_data_supplement.pdf]
